# Supplementary material for: Modulation of miRNA expression in aged rat hippocampus by buttermilk and krill oil
Source: PubMed Central journal article supplement (PMC5838111; doi:10.1038/s41598-018-22148-5), 2018-03-05
Supplement: 41598_2018_22148_MOESM1_ESM.pdf [file 41598_2018_22148_MOESM1_ESM.pdf]

## **Modulation of miRNA expression in aged rat hippocampus by buttermilk and krill oil**

M. Carmen Crespo<sup>1§</sup>, Joao Tomé-Carneiro<sup>1§</sup>, Diego Gómez-Coronado<sup>6,7</sup>, Emma Burgos-Ramos<sup>3</sup>, Alba García-Serrano<sup>5</sup>, Roberto Martín-Hernández<sup>1</sup>, Shishir Baliyan<sup>8</sup>, Javier Fontecha<sup>5</sup>, Cesar Venero<sup>8</sup>, Alberto Dávalos<sup>2\*</sup>, Francesco Visioli<sup>1,4\*</sup>

<sup>1</sup>Bioactive Ingredients Food Group, IMDEA Food, Madrid-28049, Spain.

<sup>2</sup>Epigenetics of Lipid Metabolism Group, IMDEA Food, Madrid-28049, Spain.

<sup>3</sup>Área de Bioquímica, Universidad de Castilla-La-Mancha, Toledo-45071, Spain.

<sup>4</sup>Department of Molecular Medicine, University of Padova, Padova-35121, Italy.

<sup>5</sup>Bioactivity and Food Analysis Department, CIAL, CSIC-UAM, Madrid-28049, Spain.

<sup>6</sup>Servicio de Bioquímica Investigación, Hospital Universitario Ramón y Cajal, Madrid-28034, Spain.

<sup>7</sup>CIBER Fisiopatología de la Obesidad y Nutrición (CIBEROBN), Instituto de Salud Carlos III, Madrid-28029, Spain.

<sup>8</sup>Department of Psychobiology, Faculty of Psychology, UNED, Madrid-28040, Spain.

<sup>§</sup>These authors contribute equally to this work.

Corresponding author:

Alberto Dávalos

Madrid Institute for Advanced Studies (IMDEA)-Food, Madrid, Spain

e-mail: [alberto.davalos@imdea.org](mailto:alberto.davalos@imdea.org) (AD)

### **Supporting Information**

Additional supporting information may be found in the online version of this article.

**Table S1.** miRNA sequencing results.

**Table S2.** Selected miRNAs for validation by RT-qPCR.

**Table S3.** Functional analysis of the significant miRNA of NGS validated by PCR. (Excel File)

**Table S4.** Gene expression microarray results.

**Table S5.** Functional analysis of the significant genes of the array. (Excel File)

**Table S6.** Differently expressed genes from microarray results selected for validation by RT-qPCR.

**Table S7.** Sequence of miRNAs primers selected for validation.

**Table S8.** Sequence of genes primers selected for validation.

**Table S1.** miRNA sequencing results

|                            | <b>miRNA</b>       | <b>logFC</b> | <b>PValue</b> | <b>FDR</b> |
|----------------------------|--------------------|--------------|---------------|------------|
| <b>BMFC vs<br/>Control</b> | <b>miR-146a-3p</b> | -3.674       | 0.000         | 0.013      |
|                            | <b>miR-3552</b>    | -3.389       | 0.000         | 0.013      |
|                            | <b>miR-181a-5p</b> | -2.760       | 0.001         | 0.039      |
|                            | <b>miR-17-1-3p</b> | -2.168       | 0.001         | 0.032      |
|                            | <b>miR-483-3p</b>  | -2.083       | 0.001         | 0.032      |
|                            | <b>miR-17-5p</b>   | -1.756       | 0.001         | 0.033      |
|                            | <b>miR-20a-5p</b>  | -1.575       | 0.000         | 0.013      |
|                            | <b>miR-339-5p</b>  | -1.569       | 0.000         | 0.013      |
|                            | <b>miR-99a-3p</b>  | -1.501       | 0.001         | 0.032      |
|                            | <b>miR-3102</b>    | -1.397       | 0.000         | 0.008      |
|                            | <b>miR-31a-5p</b>  | -1.394       | 0.001         | 0.033      |
|                            | <b>miR-582-5p</b>  | -1.376       | 0.001         | 0.032      |
|                            | <b>miR-3065-3p</b> | -1.261       | 0.001         | 0.035      |
|                            | <b>miR-369-3p</b>  | -1.255       | 0.002         | 0.044      |
|                            | <b>miR-872-3p</b>  | -1.238       | 0.001         | 0.039      |
|                            | <b>miR-219a-5p</b> | -1.147       | 0.001         | 0.032      |
|                            | <b>miR-674-5p</b>  | -1.004       | 0.002         | 0.041      |
|                            | <b>miR-450a-5p</b> | -0.970       | 0.001         | 0.032      |
|                            | <b>miR-15b-5p</b>  | -0.956       | 0.002         | 0.044      |
|                            | <b>miR-181b-5p</b> | -0.932       | 0.001         | 0.040      |
|                            | <b>let-7f-5p</b>   | 0.822        | 0.002         | 0.045      |
|                            | <b>miR-148a-5p</b> | 0.918        | 0.002         | 0.047      |
|                            | <b>miR-195-3p</b>  | 1.023        | 0.002         | 0.042      |

|  | <b>miRNA</b>       | <b>logFC</b> | <b>PValue</b> | <b>FDR</b> |
|--|--------------------|--------------|---------------|------------|
|  | <b>miR-17-5p</b>   | -2.747       | 0.001         | 0.008      |
|  | <b>miR-3583-3p</b> | -2.575       | 0.011         | 0.045      |
|  | <b>miR-362-3p</b>  | -2.464       | 0.002         | 0.013      |
|  | <b>miR-17-1-3p</b> | -2.377       | 0.007         | 0.031      |
|  | <b>miR-20a-5p</b>  | -2.305       | 0.000         | 0.000      |
|  | <b>miR-449a-5p</b> | -2.287       | 0.002         | 0.014      |
|  | <b>miR-369-3p</b>  | -2.254       | 0.000         | 0.006      |
|  | <b>miR-362-5p</b>  | -2.242       | 0.001         | 0.009      |
|  | <b>let-7f-2-3p</b> | -2.192       | 0.002         | 0.015      |
|  | <b>miR-339-5p</b>  | -2.154       | 0.000         | 0.004      |
|  | <b>miR-764-3p</b>  | -2.115       | 0.011         | 0.043      |
|  | <b>miR-107-3p</b>  | -2.102       | 0.000         | 0.002      |
|  | <b>miR-194-5p</b>  | -1.922       | 0.000         | 0.002      |
|  | <b>miR-770-5p</b>  | -1.899       | 0.001         | 0.009      |
|  | <b>miR-144-5p</b>  | -1.896       | 0.006         | 0.028      |
|  | <b>miR-93-3p</b>   | -1.876       | 0.003         | 0.018      |
|  | <b>miR-374-5p</b>  | -1.849       | 0.000         | 0.001      |
|  | <b>miR-582-5p</b>  | -1.824       | 0.000         | 0.003      |
|  | <b>miR-3065-3p</b> | -1.797       | 0.000         | 0.002      |
|  | <b>miR-137-3p</b>  | -1.771       | 0.000         | 0.002      |
|  | <b>miR-99a-3p</b>  | -1.699       | 0.001         | 0.008      |
|  | <b>miR-106b-5p</b> | -1.696       | 0.000         | 0.001      |
|  | <b>miR-324-3p</b>  | -1.689       | 0.000         | 0.005      |
|  | <b>miR-539-3p</b>  | -1.671       | 0.000         | 0.006      |
|  | <b>miR-143-5p</b>  | -1.592       | 0.001         | 0.008      |
|  | <b>miR-34c-3p</b>  | -1.585       | 0.003         | 0.017      |
|  | <b>miR-30c-5p</b>  | -1.546       | 0.001         | 0.007      |
|  | <b>miR-494-3p</b>  | -1.543       | 0.000         | 0.006      |
|  | <b>miR-872-3p</b>  | -1.522       | 0.001         | 0.009      |

|                                |                    |        |       |       |
|--------------------------------|--------------------|--------|-------|-------|
| <b>BMFC+KOC<br/>vs Control</b> | <b>miR-98-3p</b>   | -1.465 | 0.009 | 0.038 |
|                                | <b>miR-31a-5p</b>  | -1.457 | 0.000 | 0.004 |
|                                | <b>miR-16-5p</b>   | -1.453 | 0.000 | 0.002 |
|                                | <b>miR-126a-5p</b> | -1.408 | 0.001 | 0.008 |
|                                | <b>miR-708-5p</b>  | -1.396 | 0.000 | 0.005 |
|                                | <b>miR-410-3p</b>  | -1.391 | 0.000 | 0.006 |
|                                | <b>miR-1193-3p</b> | -1.344 | 0.008 | 0.033 |
|                                | <b>miR-425-3p</b>  | -1.326 | 0.002 | 0.015 |
|                                | <b>miR-93-5p</b>   | -1.272 | 0.000 | 0.004 |
|                                | <b>miR-674-5p</b>  | -1.266 | 0.001 | 0.008 |
|                                | <b>miR-376b-3p</b> | -1.238 | 0.004 | 0.022 |
|                                | <b>miR-361-5p</b>  | -1.225 | 0.001 | 0.009 |
|                                | <b>miR-181b-5p</b> | -1.222 | 0.001 | 0.009 |
|                                | <b>miR-221-3p</b>  | -1.216 | 0.001 | 0.008 |
|                                | <b>miR-219a-5p</b> | -1.200 | 0.007 | 0.033 |
|                                | <b>miR-450a-5p</b> | -1.181 | 0.001 | 0.008 |
|                                | <b>miR-186-5p</b>  | -1.177 | 0.000 | 0.006 |
|                                | <b>miR-138-5p</b>  | -1.166 | 0.001 | 0.009 |
|                                | <b>miR-497-5p</b>  | -1.146 | 0.007 | 0.029 |
|                                | <b>miR-3589</b>    | -1.126 | 0.003 | 0.019 |
|                                | <b>let-7e-3p</b>   | -1.079 | 0.001 | 0.009 |
|                                | <b>miR-384-5p</b>  | -1.073 | 0.004 | 0.022 |
|                                | <b>miR-98-5p</b>   | -1.071 | 0.001 | 0.009 |
|                                | <b>miR-15b-5p</b>  | -1.048 | 0.006 | 0.027 |
|                                | <b>miR-384-3p</b>  | -0.997 | 0.006 | 0.028 |
|                                | <b>miR-874-3p</b>  | -0.986 | 0.004 | 0.023 |
|                                | <b>miR-379-3p</b>  | -0.970 | 0.002 | 0.015 |
|                                | <b>miR-23a-3p</b>  | -0.892 | 0.006 | 0.028 |
|                                | <b>miR-195-5p</b>  | -0.891 | 0.006 | 0.028 |
|                                | <b>miR-191a-5p</b> | -0.874 | 0.003 | 0.016 |
|                                | <b>miR-140-5p</b>  | -0.863 | 0.003 | 0.019 |
|                                | <b>miR-421-3p</b>  | -0.863 | 0.009 | 0.038 |
|                                | <b>miR-26b-5p</b>  | -0.848 | 0.004 | 0.022 |
|                                | <b>miR-146a-5p</b> | -0.844 | 0.004 | 0.021 |
|                                | <b>miR-29a-3p</b>  | -0.835 | 0.007 | 0.033 |
|                                | <b>miR-543-3p</b>  | 0.690  | 0.012 | 0.047 |
|                                | <b>miR-455-5p</b>  | 0.763  | 0.012 | 0.047 |
|                                | <b>miR-495</b>     | 0.810  | 0.006 | 0.028 |
|                                | <b>let-7i-5p</b>   | 0.811  | 0.007 | 0.030 |
|                                | <b>miR-541-5p</b>  | 0.822  | 0.009 | 0.038 |
|                                | <b>miR-134-5p</b>  | 0.840  | 0.010 | 0.041 |
| <b>miR-143-3p</b>              | 0.884              | 0.005  | 0.024 |       |
| <b>miR-135a-3p</b>             | 0.899              | 0.008  | 0.033 |       |
| <b>miR-125-1-3p</b>            | 0.899              | 0.009  | 0.038 |       |
| <b>let-7f-5p</b>               | 0.905              | 0.005  | 0.027 |       |
| <b>miR-139-5p</b>              | 0.923              | 0.001  | 0.009 |       |
| <b>miR-99a-5p</b>              | 0.940              | 0.004  | 0.021 |       |
| <b>miR-361-3p</b>              | 0.965              | 0.006  | 0.028 |       |
| <b>miR-185-3p</b>              | 0.969              | 0.009  | 0.038 |       |
| <b>miR-99b-5p</b>              | 0.973              | 0.010  | 0.038 |       |
| <b>miR-380-5p</b>              | 0.975              | 0.005  | 0.023 |       |
| <b>miR-6331</b>                | 0.976              | 0.004  | 0.021 |       |
| <b>miR-128-3p</b>              | 0.981              | 0.003  | 0.018 |       |
| <b>miR-30c-2-3p</b>            | 0.995              | 0.001  | 0.010 |       |
| <b>miR-1843-5p</b>             | 1.008              | 0.005  | 0.023 |       |
| <b>miR-106b-3p</b>             | 1.015              | 0.003  | 0.018 |       |
| <b>miR-192-5p</b>              | 1.042              | 0.001  | 0.010 |       |
| <b>miR-3559-3p</b>             | 1.060              | 0.009  | 0.038 |       |

|                     |       |       |       |
|---------------------|-------|-------|-------|
| <b>miR-1843-5p</b>  | 1.092 | 0.004 | 0.022 |
| <b>miR-99b-3p</b>   | 1.156 | 0.001 | 0.008 |
| <b>miR-184</b>      | 1.180 | 0.003 | 0.019 |
| <b>miR-30e-3p</b>   | 1.208 | 0.002 | 0.013 |
| <b>miR-676</b>      | 1.227 | 0.000 | 0.003 |
| <b>miR-344-1-3p</b> | 1.236 | 0.000 | 0.001 |
| <b>miR-673-3p</b>   | 1.264 | 0.000 | 0.004 |
| <b>miR-770-3p</b>   | 1.302 | 0.000 | 0.005 |
| <b>miR-493-3p</b>   | 1.320 | 0.002 | 0.015 |
| <b>miR-370-3p</b>   | 1.367 | 0.001 | 0.009 |
| <b>miR-485-5p</b>   | 1.383 | 0.001 | 0.010 |
| <b>miR-379-5p</b>   | 1.393 | 0.000 | 0.002 |
| <b>miR-3557-5p</b>  | 1.422 | 0.000 | 0.003 |
| <b>miR-127-3p</b>   | 1.423 | 0.000 | 0.001 |
| <b>miR-129-5p</b>   | 1.460 | 0.002 | 0.015 |
| <b>miR-219-1-3p</b> | 1.464 | 0.002 | 0.012 |
| <b>miR-150-3p</b>   | 1.605 | 0.001 | 0.007 |
| <b>miR-671</b>      | 1.615 | 0.000 | 0.004 |
| <b>miR-381-3p</b>   | 1.639 | 0.000 | 0.002 |
| <b>miR-674-3p</b>   | 1.665 | 0.000 | 0.001 |
| <b>miR-148a-5p</b>  | 1.682 | 0.000 | 0.001 |
| <b>miR-6329</b>     | 1.690 | 0.000 | 0.001 |
| <b>miR-10a-5p</b>   | 1.697 | 0.002 | 0.012 |
| <b>miR-27a-5p</b>   | 1.725 | 0.000 | 0.002 |
| <b>miR-409b</b>     | 1.728 | 0.000 | 0.001 |
| <b>miR-10b-5p</b>   | 1.748 | 0.002 | 0.012 |
| <b>miR-195-3p</b>   | 1.829 | 0.000 | 0.001 |
| <b>miR-708-3p</b>   | 1.935 | 0.000 | 0.000 |
| <b>miR-6315</b>     | 1.984 | 0.000 | 0.003 |
| <b>miR-151-3p</b>   | 2.087 | 0.000 | 0.004 |
| <b>miR-148a-3p</b>  | 2.288 | 0.000 | 0.000 |
| <b>miR-124-5p</b>   | 3.505 | 0.002 | 0.013 |

BMFC: buttermilk fat concentrate rich in phospho- and sphingolipids; KOC: krill oil concentrate rich in omega-3 fatty acids (eicosapentaenoic acid and docosahexaenoic acid) and phospholipids; BMFC+KOC: combination of BMFC and KOC.

**Table S2.** Selected miRNAs for validation by RT-qPCR.

|                 | <b>miRNA</b>       | <b>logFC</b> | <b>PValue</b> | <b>FDR</b> | <b>Function</b>                                                                      |
|-----------------|--------------------|--------------|---------------|------------|--------------------------------------------------------------------------------------|
| <b>BMFC</b>     | <b>let-7f-5p</b>   | 0.822        | 0.002         | 0.045      | Down-regulation in AD                                                                |
|                 | <b>miR-195-3p</b>  | 1.023        | 0.002         | 0.042      | Role in determining dementia susceptibility                                          |
|                 | <b>miR-148a-5p</b> | 0.918        | 0.002         | 0.047      | Inhibition induces hepatocellular tumorigenesis                                      |
| <b>BMFC+KOC</b> | <b>miR-99a-5p</b>  | 0.940        | 0.004         | 0.021      | Neuroprotective effect                                                               |
|                 | <b>miR-128-3p</b>  | 0.981        | 0.003         | 0.018      | Critical for hippocampus-related contextual learning                                 |
|                 | <b>miR-148a-3p</b> | 2.288        | 0.000         | 0.000      | Downregulation in AD                                                                 |
|                 | <b>miR-29a-3p</b>  | -0.835       | 0.007         | 0.033      | Neuronal synapse formation and plasticity                                            |
|                 | <b>miR-191a-5p</b> | -0.874       | 0.003         | 0.016      | Target genes to apoptosis and cell death pathways                                    |
|                 | <b>miR-381-3p</b>  | 1.639        | 0.000         | 0.002      | Linked to insulin resistance or T2D                                                  |
|                 | <b>miR-379-5p</b>  | 1.393        | 0.000         | 0.002      | Predispose to neuropathic pain identified                                            |
|                 | <b>miR-30e-3p</b>  | 1.208        | 0.002         | 0.013      | Linked to insulin resistance                                                         |
|                 | <b>miR-146a-5p</b> | -0.844       | 0.004         | 0.021      | Associated with AD.                                                                  |
|                 | <b>miR-370-3p</b>  | 1.367        | 0.001         | 0.009      | Downregulated by Mild Stress in Rat Hippocampal Tissues                              |
|                 | <b>let-7f-5p</b>   | 0.905        | 0.005         | 0.027      | Downregulation in AD                                                                 |
|                 | <b>miR-770-3p</b>  | 1.302        | 0.000         | 0.005      | Down-regulated in the hippocampus of Sprague-Dawley rats with temporal lobe epilepsy |
|                 | <b>miR-106b-3p</b> | 1.015        | 0.003         | 0.018      | Protect mitochondrial functions                                                      |
|                 | <b>miR-195-3p</b>  | 1.829        | 0.000         | 0.001      | Downregulation in AD                                                                 |
|                 | <b>miR-148a-5p</b> | 1.682        | 0.000         | 0.001      | Cancer                                                                               |

BMFC: buttermilk fat concentrate rich in phospho- and sphingolipids; KOC: krill oil concentrate rich in omega-3 fatty acids (eicosapentaenoic acid and docosahexaenoic acid) and phospholipids; BMFC+KOC: combination of BMFC and KOC.

**Table S3** (see Excel file attached to this manuscript supporting information)

**Table S4.** Gene expression microarray results.

|               | <b>Gene</b>      | <b>logFC</b> | <b>P.Value</b> | <b>Adj.P.Val</b> |
|---------------|------------------|--------------|----------------|------------------|
| <b>KOC</b>    | <b>Kcnj13</b>    | -3           | 0.0000         | 0.0315           |
|               | <b>Dpt</b>       | -2.4         | 0.0000         | 0.0275           |
|               | <b>Tph1</b>      | -2.1         | 0.0000         | 0.0000           |
|               | <b>Slc35f4</b>   | -2           | 0.0001         | 0.0452           |
|               | <b>Exoc5</b>     | -1.8         | 0.0000         | 0.0315           |
|               | <b>Barx1</b>     | -1.7         | 0.0000         | 0.0005           |
|               | <b>Ippk</b>      | -1.5         | 0.0000         | 0.0013           |
|               | <b>Lilrb3l</b>   | -1.4         | 0.0000         | 0.0013           |
|               | <b>P4hb</b>      | -1.3         | 0.0000         | 0.0008           |
|               | <b>Cenpn</b>     | -1.3         | 0.0001         | 0.0438           |
|               | <b>---</b>       | -1.2         | 0.0000         | 0.0049           |
|               | <b>Enpp2</b>     | -1.2         | 0.0001         | 0.0380           |
|               | <b>Osr1</b>      | -1.1         | 0.0000         | 0.0275           |
|               | <b>Ptgds</b>     | -1.1         | 0.0000         | 0.0315           |
|               | <b>LOC654482</b> | -1.1         | 0.0001         | 0.0341           |
|               | <b>Slc6a20</b>   | -1.1         | 0.0001         | 0.0380           |
|               | <b>Bcd2</b>      | -1           | 0.0000         | 0.0226           |
|               | <b>Ch25h</b>     | -1           | 0.0000         | 0.0293           |
|               | <b>Arhgef15</b>  | -1           | 0.0001         | 0.0371           |
|               | <b>Sox21</b>     | -1           | 0.0001         | 0.0452           |
|               | <b>Nutm2f</b>    | -1           | 0.0001         | 0.0452           |
|               | <b>Rarres1</b>   | -0.9         | 0.0000         | 0.0315           |
|               | <b>Car13</b>     | -0.9         | 0.0001         | 0.0332           |
|               | <b>Id4</b>       | -0.9         | 0.0001         | 0.0438           |
|               | <b>Efhc1</b>     | -0.9         | 0.0002         | 0.0490           |
|               | <b>Ctsc</b>      | -0.8         | 0.0001         | 0.0452           |
|               | <b>Aox4</b>      | -0.8         | 0.0001         | 0.0452           |
|               | <b>Gpr135</b>    | 0.8          | 0.0001         | 0.0426           |
|               | <b>Pygo2</b>     | 0.8          | 0.0001         | 0.0452           |
|               | <b>Fam163b</b>   | 0.8          | 0.0001         | 0.0452           |
|               | <b>Ptpn4</b>     | 0.8          | 0.0001         | 0.0452           |
|               | <b>St6gal2</b>   | 0.8          | 0.0002         | 0.0495           |
|               | <b>Pak6</b>      | 0.9          | 0.0000         | 0.0315           |
| <b>Arc</b>    | 0.9              | 0.0000       | 0.0315         |                  |
| <b>Ramp3</b>  | 0.9              | 0.0001       | 0.0341         |                  |
| <b>Cckbr</b>  | 0.9              | 0.0001       | 0.0371         |                  |
| <b>N4bp2</b>  | 1                | 0.0000       | 0.0266         |                  |
| <b>Yeats2</b> | 1                | 0.0001       | 0.0438         |                  |
| <b>BMFC</b>   | <b>Kcnj13</b>    | -2.8         | 2.53E-12       | 2.91E-08         |
|               | <b>Dpt</b>       | -2.3         | 8.23E-11       | 4.74E-07         |
|               | <b>Zfp358</b>    | -2.1         | 4.15E-09       | 6.81E-06         |
|               | <b>Cbr3</b>      | -2           | 2.60E-09       | 4.99E-06         |

|                  |      |          |            |
|------------------|------|----------|------------|
| <b>Mfrp</b>      | -2   | 1.51E-08 | 2.17E-05   |
| <b>Tmem72</b>    | -1.9 | 5.70E-08 | 7.29E-05   |
| <b>Sostdc1</b>   | -1.8 | 4.66E-10 | 1.34E-06   |
| <b>Barx1</b>     | -1.8 | 4.56E-10 | 1.34E-06   |
| <b>Ippk</b>      | -1.6 | 2.29E-09 | 4.99E-06   |
| <b>Slco1a5</b>   | -1.6 | 1.05E-07 | 0.00011518 |
| <b>Tph1</b>      | -1.6 | 2.45E-06 | 0.0011723  |
| <b>Ahsg</b>      | -1.5 | 3.48E-07 | 0.00026687 |
| <b>Slc35f4</b>   | -1.4 | 1.10E-07 | 0.00011518 |
| <b>Exoc5</b>     | -1.4 | 1.75E-07 | 0.00016792 |
| <b>Slc4a5</b>    | -1.4 | 2.40E-07 | 0.00020184 |
| <b>Slc13a4</b>   | -1.4 | 4.28E-07 | 0.00029527 |
| <b>Prlr</b>      | -1.4 | 1.45E-05 | 0.00476127 |
| <b>Ict1</b>      | -1.3 | 2.46E-07 | 0.00020184 |
| <b>C7</b>        | -1.3 | 4.88E-07 | 0.00029527 |
| <b>Prr32</b>     | -1.3 | 6.79E-07 | 0.00039051 |
| <b>Zfp24</b>     | -1.3 | 6.74E-06 | 0.0025839  |
| <b>Ptgds</b>     | -1.2 | 4.47E-07 | 0.00029527 |
| <b>---</b>       | -1.2 | 4.70E-07 | 0.00029527 |
| <b>Slc6a20</b>   | -1.2 | 7.25E-07 | 0.00039735 |
| <b>Aqp1</b>      | -1.2 | 7.68E-06 | 0.00276169 |
| <b>Cldn2</b>     | -1.2 | 5.98E-05 | 0.01465844 |
| <b>Myog</b>      | -1.1 | 1.60E-06 | 0.00079918 |
| <b>Ctsc</b>      | -1.1 | 3.03E-06 | 0.00134359 |
| <b>Enpp2</b>     | -1.1 | 3.04E-06 | 0.00134359 |
| <b>Ch25h</b>     | -1.1 | 3.43E-06 | 0.00146244 |
| <b>Abca4</b>     | -1.1 | 4.89E-06 | 0.00200889 |
| <b>Folr1</b>     | -1.1 | 2.45E-05 | 0.00721838 |
| <b>Cbr1</b>      | -1.1 | 5.20E-05 | 0.01329863 |
| <b>Emp3</b>      | -1   | 6.23E-06 | 0.00247225 |
| <b>Bicd2</b>     | -1   | 1.24E-05 | 0.00430572 |
| <b>LOC654482</b> | -1   | 1.31E-05 | 0.0044311  |
| <b>Mospd1</b>    | -1   | 1.67E-05 | 0.00533843 |
| <b>Lepr</b>      | -1   | 1.77E-05 | 0.00551727 |
| <b>P4hb</b>      | -1   | 2.09E-05 | 0.00632722 |
| <b>Atp11c</b>    | -1   | 3.81E-05 | 0.01086025 |
| <b>Cenpn</b>     | -1   | 4.38E-05 | 0.01184456 |
| <b>Igf2</b>      | -1   | 6.44E-05 | 0.01544012 |
| <b>Rpl9</b>      | -1   | 8.19E-05 | 0.01884002 |
| <b>Sst</b>       | -1   | 8.66E-05 | 0.01952348 |
| <b>Tmem27</b>    | -1   | 0.000134 | 0.02854155 |
| <b>Elovl7</b>    | -0.9 | 3.87E-05 | 0.01086025 |
| <b>Pla2g5</b>    | -0.9 | 4.43E-05 | 0.01184456 |
| <b>Ranbp3l</b>   | -0.9 | 4.77E-05 | 0.01247554 |
| <b>Hmgb2l1</b>   | -0.9 | 5.99E-05 | 0.01465844 |

|                 |                  |      |            |            |
|-----------------|------------------|------|------------|------------|
|                 | <b>Trim34</b>    | -0.9 | 6.94E-05   | 0.01628543 |
|                 | <b>Capn7</b>     | -0.9 | 0.00011415 | 0.02525007 |
|                 | <b>Slc2a12</b>   | -0.9 | 0.00013173 | 0.02854155 |
|                 | <b>C1qtnf3</b>   | -0.9 | 0.00014208 | 0.02971226 |
|                 | <b>Mdk</b>       | -0.9 | 0.00014941 | 0.03068729 |
|                 | <b>Slc22a8</b>   | -0.8 | 0.00021362 | 0.04310616 |
|                 | <b>Spata20</b>   | -0.8 | 0.00022686 | 0.04498921 |
|                 | <b>Arc</b>       | 1    | 7.18E-06   | 0.00266579 |
|                 | <b>Adss</b>      | 1.3  | 1.03E-06   | 0.00053942 |
| <b>BMFC+KOC</b> | <b>Zfp358</b>    | -3.6 | 0.0000     | 0.0000     |
|                 | <b>Kcnj13</b>    | -3.9 | 0.0000     | 0.0000     |
|                 | <b>Dpt</b>       | -3.7 | 0.0000     | 0.0000     |
|                 | <b>Zfp24</b>     | -3.5 | 0.0000     | 0.0000     |
|                 | <b>Cbr3</b>      | -3.4 | 0.0000     | 0.0000     |
|                 | <b>Mfrp</b>      | -3.2 | 0.0000     | 0.0000     |
|                 | <b>Sostdc1</b>   | -2.9 | 0.0000     | 0.0000     |
|                 | <b>Tmem72</b>    | -2.9 | 0.0000     | 0.0000     |
|                 | <b>Prlr</b>      | -2.6 | 0.0000     | 0.0000     |
|                 | <b>Ahsg</b>      | -2.4 | 0.0000     | 0.0000     |
|                 | <b>Exoc5</b>     | -2.4 | 0.0000     | 0.0000     |
|                 | <b>Cldn2</b>     | -2.4 | 0.0000     | 0.0001     |
|                 | <b>Slc35f4</b>   | -2.2 | 0.0000     | 0.0000     |
|                 | <b>Slc4a5</b>    | -2.1 | 0.0000     | 0.0000     |
|                 | <b>Folr1</b>     | -2   | 0.0000     | 0.0000     |
|                 | <b>Prr32</b>     | -2   | 0.0000     | 0.0000     |
|                 | <b>Slco1a5</b>   | -2   | 0.0000     | 0.0000     |
|                 | <b>Ict1</b>      | -1.9 | 0.0000     | 0.0000     |
|                 | <b>Tmem27</b>    | -1.8 | 0.0000     | 0.0010     |
|                 | <b>Sst</b>       | -1.6 | 0.0000     | 0.0011     |
|                 | <b>Cenpn</b>     | -1.5 | 0.0000     | 0.0002     |
|                 | <b>Aqp1</b>      | -1.5 | 0.0000     | 0.0007     |
|                 | <b>Abca4</b>     | -1.5 | 0.0000     | 0.0007     |
|                 | <b>Cbr1</b>      | -1.5 | 0.0000     | 0.0022     |
|                 | <b>Slc13a4</b>   | -1.5 | 0.0000     | 0.0117     |
|                 | <b>Htr2c</b>     | -1.4 | 0.0000     | 0.0008     |
|                 | <b>Capn7</b>     | -1.3 | 0.0000     | 0.0014     |
|                 | <b>Itpril1</b>   | -1.2 | 0.0000     | 0.0015     |
|                 | <b>Glycam1</b>   | -1.2 | 0.0000     | 0.0015     |
|                 | <b>Pla2g5</b>    | -1.2 | 0.0000     | 0.0017     |
|                 | <b>LOC654482</b> | -1.2 | 0.0000     | 0.0022     |
|                 | <b>Rpl9</b>      | -1.2 | 0.0000     | 0.0063     |
|                 | <b>Enpp2</b>     | -1.1 | 0.0000     | 0.0021     |
|                 | <b>Spata20</b>   | -1.1 | 0.0000     | 0.0044     |
|                 | <b>Itgb6</b>     | -1.1 | 0.0000     | 0.0057     |
|                 | <b>Atp11c</b>    | -1.1 | 0.0000     | 0.0070     |



|                     |      |        |        |
|---------------------|------|--------|--------|
| <b>Scgb1c1</b>      | -1.1 | 0.0000 | 0.0077 |
| <b>Aimp2</b>        | -1.1 | 0.0000 | 0.0098 |
| <b>Mdk</b>          | -1.1 | 0.0001 | 0.0231 |
| <b>Slc2a12</b>      | -1.1 | 0.0003 | 0.0475 |
| <b>Efhc1</b>        | -1   | 0.0000 | 0.0075 |
| <b>Tbc1d10a</b>     | -1   | 0.0000 | 0.0088 |
| <b>Creg1</b>        | -1   | 0.0001 | 0.0177 |
| <b>Diaph3</b>       | -1   | 0.0001 | 0.0239 |
| <b>Narfl</b>        | -0.9 | 0.0000 | 0.0082 |
| <b>Wdr63</b>        | -0.9 | 0.0000 | 0.0100 |
| <b>RGD1564074</b>   | -0.9 | 0.0000 | 0.0111 |
| <b>Glipr2</b>       | -0.9 | 0.0000 | 0.0117 |
| <b>Fbxo45</b>       | -0.9 | 0.0000 | 0.0119 |
| <b>LOC100909960</b> | -0.9 | 0.0001 | 0.0134 |
| <b>Lama2</b>        | -0.9 | 0.0001 | 0.0163 |
| <b>Cars2</b>        | -0.9 | 0.0001 | 0.0264 |
| <b>Olr109</b>       | -0.9 | 0.0001 | 0.0289 |
| <b>Slc4a2</b>       | -0.9 | 0.0002 | 0.0316 |
| <b>Wfs1</b>         | -0.9 | 0.0002 | 0.0365 |
| <b>Muc1911</b>      | -0.8 | 0.0001 | 0.0239 |
| <b>Igfbpl1</b>      | -0.8 | 0.0002 | 0.0383 |
| <b>Mast3</b>        | -0.8 | 0.0002 | 0.0384 |
| <b>---</b>          | -0.8 | 0.0002 | 0.0415 |
| <b>Fam92b</b>       | -0.8 | 0.0003 | 0.0473 |
| <b>Six3</b>         | -0.8 | 0.0003 | 0.0486 |
| <b>LOC100911887</b> | 0.8  | 0.0001 | 0.0276 |
| <b>Samd15</b>       | 0.8  | 0.0002 | 0.0365 |
| <b>Tnks</b>         | 0.8  | 0.0003 | 0.0465 |
| <b>Sptssb</b>       | 0.8  | 0.0003 | 0.0469 |
| <b>Satb2</b>        | 0.8  | 0.0003 | 0.0489 |
| <b>ATP6</b>         | 0.8  | 0.0003 | 0.0489 |
| <b>MGC116197</b>    | 0.9  | 0.0002 | 0.0342 |
| <b>LOC102550585</b> | 1    | 0.0000 | 0.0068 |
| <b>Cckbr</b>        | 1    | 0.0000 | 0.0070 |
| <b>LOC102555217</b> | 1    | 0.0000 | 0.0082 |
| <b>Npas4</b>        | 1    | 0.0002 | 0.0351 |

BMFC: buttermilk fat concentrate rich in phospho- and sphingolipids; KOC: krill oil concentrate rich in omega-3 fatty acids (eicosapentaenoic acid and docosahexaenoic acid) and phospholipids; BMFC+KOC: combination of BMFC and KOC.

**Table S5** (see Excel file attached to this manuscript supporting information)

**Table S6.** Differently expressed genes from microarray results selected for validation by RT-qPCR.

| <b>Gene</b>   | <b>miR Interaction</b> | <b>Study group</b> | <b>Gene Function</b>                                                                                                          | <b>miRNA Function</b>                                   |
|---------------|------------------------|--------------------|-------------------------------------------------------------------------------------------------------------------------------|---------------------------------------------------------|
| <b>Arc</b>    | 7f-5p                  | KOC                | Neuronal plasticity and memory                                                                                                | Downregulation in AD                                    |
| <b>Cbr3</b>   | 191a-5p                | BMFC               | Parkinson's disease                                                                                                           | Target genes to apoptosis and cell death pathways       |
|               | 106b                   | BMFC+KOC           | Parkinson's disease.                                                                                                          | Protect mitochondrial functions                         |
| <b>tshz3</b>  | 148a-5p                | BMFC+KOC           | Reduced expression of this gene and consequent caspase upregulation may be correlated with progression of Alzheimer's disease | Inhibition induces hepatocellular tumorigenesis         |
|               | 195-3p                 |                    |                                                                                                                               | Downregulation in AD                                    |
|               | 30e-3p                 |                    |                                                                                                                               | Linked to insulin resistance                            |
|               | 381-3p                 |                    |                                                                                                                               |                                                         |
| <b>pla2g5</b> | 106b                   | BMFC+KOC           | Increased in several neurological and neurodegenerative disorders                                                             | Protect mitochondrial functions                         |
|               | 148a-3p                |                    |                                                                                                                               | Downregulation in AD                                    |
|               | 195-3p                 |                    |                                                                                                                               | Downregulation in AD                                    |
| <b>htr2c</b>  | 195-3p                 | BMFC+KOC           | Signaling of neurotransmitters                                                                                                | Downregulation in AD                                    |
|               | 379-5p                 |                    |                                                                                                                               | Predispose to neuropathic pain identified               |
| <b>Mrps23</b> | 379-5p                 | KOC                | Mitochondrial ribosomal proteins                                                                                              | Predispose to neuropathic pain identified               |
| <b>Capn7</b>  | 128-3p                 | BMFC               | Calpains are ubiquitous, have been implicated in neurodegenerative processes,                                                 | Critical for hippocampus-related contextual learning    |
|               | 370-3p                 | KOC                |                                                                                                                               | Downregulated by Mild Stress in Rat Hippocampal Tissues |
|               | 128-3p                 | BMFC+KOC           |                                                                                                                               | Critical for hippocampus-related contextual learning    |
|               | 370-3p                 |                    |                                                                                                                               | Downregulated by Mild Stress in Rat Hippocampal Tissues |

|              |         |            |                           |                                                                                      |
|--------------|---------|------------|---------------------------|--------------------------------------------------------------------------------------|
|              | 381-3p  |            |                           | Linked to insulin resistance or T2D                                                  |
| <b>Sst</b>   | 106b    | BMFC+KOC   | Neurotransmission         | Protect mitochondrial functions                                                      |
| <b>Satb2</b> | 128-3p  | BMFC+KOC   | Memory                    | Critical for hippocampus-related contextual learning                                 |
|              | 148a-5p |            |                           | Inhibition induces hepatocellular tumorigenesis                                      |
|              | 381-3p  |            |                           | Linked to insulin resistance or T2D                                                  |
| <b>Ip6k1</b> | 148a-5p | BMFC+KOC   | Neurotransmission         | Inhibition induces hepatocellular tumorigenesis                                      |
|              | 770-3p  |            |                           | Down-regulated in the hippocampus of Sprague-Dawley rats with temporal lobe epilepsy |
| <b>Tph1</b>  | 379-5p  | BMFC & KOC | biosynthesis of serotonin | Identified in primary sensory neurons that are associated with neuropathic pain      |

Arc: activity-regulated cytoskeleton-associated protein; Cbr3: carbonyl reductase 3; Tshz3: teashirt zinc finger homeobox 3; Pla2g5: phospholipase A2, group V; Htr2c: 5-hydroxytryptamine receptor 2C; Mrps23: mitochondrial ribosomal protein S23; Capn7: calpain 7; Sst: somatostatin; Satb2: SATB homeobox 2; Ip6k1: inositol hexakisphosphate kinase 1; Tph1: tryptophan hydroxylase 1; BMFC: buttermilk fat concentrate rich in phospho- and sphingolipids; KOC: krill oil concentrate rich in omega-3 fatty acids (eicosapentaenoic acid and docosahexaenoic acid) and phospholipids; BMFC+KOC: combination of BMFC and KOC.

**Table S7.** Sequence of miRNAs primers selected for validation.

| <b>miRNA</b>           | <b>sequence</b>          |
|------------------------|--------------------------|
| <i>rno-let-7f-5p</i>   | TGAGGTAGTAGATTGTATAGTT   |
| <i>rno-miR-106b-3p</i> | CCGCACTGTGGGTA CT TGCTGC |
| <i>rno-miR-128-3p</i>  | TCACAGTGAACCGGTCTCTTT    |
| <i>rno-miR-146a-5p</i> | TGAGAACTGAATTCCATGGGTT   |
| <i>rno-miR-148a-3p</i> | TCAGTGCACTACAGAACTTTG    |
| <i>rno-miR-148a-5p</i> | AAAGTTCTGAGACACTCTGACTC  |
| <i>rno-miR-191a-5p</i> | CAACGGAATCCCAA AAGCAGCTG |
| <i>rno-miR-195-3p</i>  | CCAATATTGGCTGTGCTGCTCCA  |
| <i>rno-miR-29a-3p</i>  | TAGCACCATCTGAAATCGGTTA   |
| <i>rno-miR-30e-3p</i>  | CTTTCAGTCGGATGTTTACAGC   |
| <i>rno-miR-370-3p</i>  | GCCTGCTGGGGTGGAACCTGGT   |
| <i>rno-miR-381-3p</i>  | TATACAAGGGCAAGCTCT       |
| <i>rno-miR-770-3p</i>  | GTGGGCCTGACGTGGAG        |
| <i>rno-miR-99a-5p</i>  | AACCCGTAGATCCGATCTTGTG   |
| <i>rno-miR-379-5p</i>  | TGGTAGACTATGGAACGTAGG    |

**Table S8.** Sequence of genes primers selected for validation.

| <b>Gene</b>   | <b>Name</b>    | <b>Sequence</b>        |
|---------------|----------------|------------------------|
| <b>Arc</b>    | rno-Arc-FW     | AAAGCAGCAGCAAGATGGTT   |
|               | rno-Arc-REV    | GAGTCTTGCCTCCTGTCCTG   |
| <b>Cbr3</b>   | rno-Cbr3-FW    | GCTGCCATAATGAAACCACA   |
|               | rno-Cbr3-REV   | GTCTGGCCAACCTTCTCTCT   |
| <b>Tshz3</b>  | rno-Tshz3-FW   | GCAGCACAGCCATTATCACG   |
|               | rno-Tshz3-REV  | GGCCAGACTGTTGCTCATCT   |
| <b>Pla2g5</b> | rno-Pla2g5-FW  | CTTGGGCTGCCAGCATAAAC   |
|               | rno-Pla2g5-REV | GCAGCCGTAGAAGCCATAGT   |
| <b>Htr2c</b>  | rno-Htr2c-FW   | CGGACGGGGTACAAAACCTGG  |
|               | rno-Htr2c-REV  | AATCCAGACGGGGCACAAAT   |
| <b>Mrps23</b> | rno-Mrps23-FW  | CACATGGTGTGGTTCCTCGG   |
|               | rno-Mrps23-REV | CTTAGCCCAACCCGTGACAT   |
| <b>Capn7</b>  | rno-Capn7-FW   | AGTTCTCCTCGCAGTGCCTC   |
|               | rno-Capn7-REV  | TTGGGCAGCTTCCTTGAGTA   |
| <b>Sst</b>    | rno-Sst-FW     | ACCCAGACTCCGTCAGTTT    |
|               | rno-Sst -REV   | CCAGGGCATCGTTCTCTGTC   |
| <b>Satb2</b>  | rno-Satb2-FW   | AAAACCTCGACACCGACAAC   |
|               | rno-Satb2-REV  | CCAACGAAGCAGTTCACAGA   |
| <b>Ip6k1</b>  | rno-Ip6k1-FW   | ACCAAGGCTGCATCATTTTGAC |
|               | rno-Ip6k1-REV  | AAACACACATTGCGTTGGGG   |

Arc: activity-regulated cytoskeleton-associated protein; Cbr3: carbonyl reductase 3; Tshz3: teashirt zinc finger homeobox 3; Pla2g5: phospholipase A2, group V; Htr2c: 5-hydroxytryptamine receptor 2C; Mrps23: mitochondrial ribosomal protein S23; Capn7: calpain 7; Sst: somatostatin; Satb2: SATB homeobox 2; Ip6k1: inositol hexakisphosphate kinase 1; Tph1: tryptophan hydroxylase 1; FW: Forward; REV: Reverse.
